# Supplementary material for: Miltefosine-Lopinavir Combination Therapy Against Leishmania infantum Infection: In vitro and in vivo Approaches
Source: Front Cell Infect Microbiol. 2019 Jun 28;9:229. doi: 10.3389/fcimb.2019.00229 (PMC6611157; doi:10.3389/fcimb.2019.00229)
Supplement: Table S2 — Comparison of biochemical parameters between untreated (CI, control infected) and treated parasites with MFS or LPV administered alone or in combination. Levels of creatinine, urea, total bilirubin, cholesterol, AST (Alanine amino transferase), and ALT (Aspartate amino transferase) are shown. The data are mean ± SD of three independent experiments. *P < 0.05, **P < 0.01. [file Table_2.XLSX]

## Sheet: Planilha2
	CI	MT 15.4	MT 7.7	MT 3.85	L 493.2	L 246.6	L493.2 + MT7.7	L246.6 + MT7.7	L493.2 + MT3.85	L246.6 + MT3.85	L493.2+ MT1.92	L246.6 + MT1.92
Creatinine (mg/dL)	0.1 ± 0.05	0.1 ± 0.05	0.1 ± 0.05	0.1 ± 0.05	0.1 ± 0.05	0.1 ± 0.05	0.1 ± 0.05	0.1 ± 0.05	0.1 ± 0.05	0.1 ± 0.05	0.1 ± 0.04	0.1 ± 0.05
Urea (mg/dL)	33.90 ± 0.5	33.40 ± 0.1	33.10 ± 1.47	31.15 ± 6.45	29.60 ± 2.9	29.80 ± 1.86	36.10 ± 0,10	30.06 ± 1.09	36.48 ± 2.49	27.60 ± 1.40	20 ± 1.12	21 ± 0.9
Total Bilirubin (mg/dL)	0.54 ± 0.02	0.55 ± 0.05	0.62 ± 0.12	0.65 ± 0.05	0.58 ± 0.05	0.55 ± 0.03	0.64 ± 0.05	0.63 ± 0.04	0.65 ± 0.06	0.6 ± 0.06	0.5 ± 0.05	0.6 ± 0.1
Cholesterol (mg/dL)	92.80 ± 6.94	89 ± 1	102.8 ± 4.33	102.5 ± 1.5	117 ± 13	95 ± 2.27	98.80 ± 5.36	98 ± 4.04	95.50 ± 2.84	93.4 ± 4.8	90 ± 3.1	89 ± 4.2
AST (U/L)	64.60 ± 2.98	91.5 ± 1.5*	120.3 ± 4.1**	72 ± 1	74.5 ± 5.5*	58.67 ± 8.2	125 ± 13.07**	110.6 ± 11.22**	113 ± 17.79**	124.6 ± 15.22**	130 ± 12.5**	133 ± 13.74**
ALT (U/L)	44.40 ± 4.17	42.5 ± 2.5	53.67± 7.35	49.50 ± 7.5	53.50 ± 0.5	42.50 ± 1.71	49.80 ± 1.88	51.20 ± 4.55	48 ± 2	56 ± 4.04	50 ± 3.78	53 ± 4.56
